# Supplementary material
Source: PubMed Central journal article supplement (PMC7375386)
Supplement: JVI.00861-20-s0001.pdf [file JVI.00861-20-s0001.pdf]

**Table S1. List of MERS-CoV strains used in this study.**

|    | <b>Accession No.</b> | <b>Strain</b>                 | <b>Collection date</b> | <b>Location</b>      | <b>Host</b>         |
|----|----------------------|-------------------------------|------------------------|----------------------|---------------------|
| 1  | KT029139             | MERS-CoV/KOR/KNIH/002_05_2015 | 20-May-15              | South Korea          | Homo sapiens        |
| 2  | KT006149             | ChinaGD01                     | 27-May-15              | China                | Homo sapiens        |
| 3  | MF598722             | camel/UAE_415915_W6_2015      | 15-Apr                 | United Arab Emirates | Camelus dromedarius |
| 4  | MF598721             | camel/UAE_416452_W6_2015      | 15-Apr                 | United Arab Emirates | Camelus dromedarius |
| 5  | MF598720             | camel/UAE_416452_W5_2015      | 15-Apr                 | United Arab Emirates | Camelus dromedarius |
| 6  | MF598719             | camel/UAE_415911_W4_2015      | 15-Apr                 | United Arab Emirates | Camelus dromedarius |
| 7  | MF598717             | camel/UAE_417163_W4_2015      | 15-Apr                 | United Arab Emirates | Camelus dromedarius |
| 8  | MF598716             | camel/UAE_414486_W4_2015      | 15-Apr                 | United Arab Emirates | Camelus dromedarius |
| 9  | MF598715             | camel/UAE_416452_W4_2015      | 15-Apr                 | United Arab Emirates | Camelus dromedarius |
| 10 | MF598714             | camel/UAE_414500_W4_2015      | 15-Apr                 | United Arab Emirates | Camelus dromedarius |
| 11 | MF598713             | camel/UAE_414377_W4_2015      | 15-Apr                 | United Arab Emirates | Camelus dromedarius |
| 12 | MF598712             | camel/UAE_414492_W4_2015      | 15-Apr                 | United Arab Emirates | Camelus dromedarius |
| 13 | MF598711             | camel/UAE_414481_W4_2015      | 15-Apr                 | United Arab Emirates | Camelus dromedarius |
| 14 | MF598710             | camel/UAE_417162_W4_2015      | 15-Apr                 | United Arab Emirates | Camelus dromedarius |
| 15 | MF598709             | camel/UAE_414485_W4_2015      | 15-Apr                 | United Arab Emirates | Camelus dromedarius |
| 16 | MF598708             | camel/UAE_414492_W3_2015      | 15-Apr                 | United Arab Emirates | Camelus dromedarius |
| 17 | MF598707             | camel/UAE_415915_W3_2015      | 15-Apr                 | United Arab Emirates | Camelus dromedarius |
| 18 | MF598706             | camel/UAE_415911_W3_2015      | 15-Apr                 | United Arab Emirates | Camelus dromedarius |
| 19 | MF598705             | camel/UAE_414486_W3_2015      | 15-Apr                 | United Arab Emirates | Camelus dromedarius |
| 20 | MF598704             | camel/UAE_414500_W3_2015      | 15-Apr                 | United Arab Emirates | Camelus dromedarius |
| 21 | MF598703             | camel/UAE_414480_W3_2015      | 15-Apr                 | United Arab Emirates | Camelus dromedarius |
| 22 | MF598702             | camel/UAE_414377_W3_2015      | 15-Apr                 | United Arab Emirates | Camelus dromedarius |

|    |          |                          |        |                      |                     |
|----|----------|--------------------------|--------|----------------------|---------------------|
| 23 | MF598701 | camel/UAE_414498_W3_2015 | 15-Apr | United Arab Emirates | Camelus dromedarius |
| 24 | MF598700 | camel/UAE_414379_W3_2015 | 15-Apr | United Arab Emirates | Camelus dromedarius |
| 25 | MF598699 | camel/UAE_414485_W3_2015 | 15-Apr | United Arab Emirates | Camelus dromedarius |
| 26 | MF598698 | camel/UAE_B111_2015      | 15-Mar | United Arab Emirates | Camelus dromedarius |
| 27 | MF598697 | camel/UAE_B110_2015      | 15-Mar | United Arab Emirates | Camelus dromedarius |
| 28 | MF598696 | camel/UAE_B109_2015      | 15-Mar | United Arab Emirates | Camelus dromedarius |
| 29 | MF598695 | camel/UAE_B108_2015      | 15-Mar | United Arab Emirates | Camelus dromedarius |
| 30 | MF598694 | camel/UAE_B107_2015      | 15-Mar | United Arab Emirates | Camelus dromedarius |
| 31 | MF598693 | camel/UAE_B106_2015      | 15-Mar | United Arab Emirates | Camelus dromedarius |
| 32 | MF598692 | camel/UAE_B105_2015      | 15-Mar | United Arab Emirates | Camelus dromedarius |
| 33 | MF598691 | camel/UAE_B104_2015      | 15-Mar | United Arab Emirates | Camelus dromedarius |
| 34 | MF598690 | camel/UAE_B103_2015      | 15-Mar | United Arab Emirates | Camelus dromedarius |
| 35 | MF598689 | camel/UAE_B102_2015      | 15-Mar | United Arab Emirates | Camelus dromedarius |
| 36 | MF598688 | camel/UAE_B101_2015      | 15-Mar | United Arab Emirates | Camelus dromedarius |
| 37 | MF598687 | camel/UAE_B100_2015      | 15-Mar | United Arab Emirates | Camelus dromedarius |
| 38 | MF598686 | camel/UAE_B99_2015       | 15-Mar | United Arab Emirates | Camelus dromedarius |
| 39 | MF598685 | camel/UAE_B97_2015       | 15-Mar | United Arab Emirates | Camelus dromedarius |
| 40 | MF598684 | camel/UAE_B96_2015       | 15-Mar | United Arab Emirates | Camelus dromedarius |
| 41 | MF598683 | camel/UAE_B95_2015       | 15-Mar | United Arab Emirates | Camelus dromedarius |
| 42 | MF598682 | camel/UAE_B93_2015       | 15-Mar | United Arab Emirates | Camelus dromedarius |
| 43 | MF598681 | camel/UAE_B92_2015       | 15-Mar | United Arab Emirates | Camelus dromedarius |
| 44 | MF598680 | camel/UAE_B91_2015       | 15-Mar | United Arab Emirates | Camelus dromedarius |
| 45 | MF598679 | camel/UAE_B90_2015       | 15-Mar | United Arab Emirates | Camelus dromedarius |
| 46 | MF598678 | camel/UAE_B88_2015       | 15-Mar | United Arab Emirates | Camelus dromedarius |
| 47 | MF598677 | camel/UAE_B87_2015       | 15-Mar | United Arab Emirates | Camelus dromedarius |

|    |          |                    |        |                      |                     |
|----|----------|--------------------|--------|----------------------|---------------------|
| 48 | MF598676 | camel/UAE_B86_2015 | 15-Mar | United Arab Emirates | Camelus dromedarius |
| 49 | MF598675 | camel/UAE_B85_2015 | 15-Mar | United Arab Emirates | Camelus dromedarius |
| 50 | MF598674 | camel/UAE_B84_2015 | 15-Mar | United Arab Emirates | Camelus dromedarius |
| 51 | MF598673 | camel/UAE_B83_2015 | 15-Mar | United Arab Emirates | Camelus dromedarius |
| 52 | MF598672 | camel/UAE_B82_2015 | 15-Mar | United Arab Emirates | Camelus dromedarius |
| 53 | MF598671 | camel/UAE_B81_2015 | 15-Mar | United Arab Emirates | Camelus dromedarius |
| 54 | MF598670 | camel/UAE_B80_2015 | 15-Mar | United Arab Emirates | Camelus dromedarius |
| 55 | MF598669 | camel/UAE_B79_2015 | 15-Mar | United Arab Emirates | Camelus dromedarius |
| 56 | MF598668 | camel/UAE_B78_2015 | 15-Mar | United Arab Emirates | Camelus dromedarius |
| 57 | MF598667 | camel/UAE_B77_2015 | 15-Mar | United Arab Emirates | Camelus dromedarius |
| 58 | MF598666 | camel/UAE_B76_2015 | 15-Mar | United Arab Emirates | Camelus dromedarius |
| 59 | MF598665 | camel/UAE_B75_2015 | 15-Mar | United Arab Emirates | Camelus dromedarius |
| 60 | MF598664 | camel/UAE_B74_2015 | 15-Mar | United Arab Emirates | Camelus dromedarius |
| 61 | MF598663 | camel/UAE_B73_2015 | 15-Mar | United Arab Emirates | Camelus dromedarius |
| 62 | MF598662 | camel/UAE_B72_2015 | 15-Mar | United Arab Emirates | Camelus dromedarius |
| 63 | MF598661 | camel/UAE_B71_2015 | 15-Mar | United Arab Emirates | Camelus dromedarius |
| 64 | MF598660 | camel/UAE_B70_2015 | 15-Mar | United Arab Emirates | Camelus dromedarius |
| 65 | MF598659 | camel/UAE_B69_2015 | 15-Mar | United Arab Emirates | Camelus dromedarius |
| 66 | MF598658 | camel/UAE_B68_2015 | 15-Mar | United Arab Emirates | Camelus dromedarius |
| 67 | MF598657 | camel/UAE_B67_2015 | 15-Mar | United Arab Emirates | Camelus dromedarius |
| 68 | MF598656 | camel/UAE_B66_2015 | 15-Mar | United Arab Emirates | Camelus dromedarius |
| 69 | MF598655 | camel/UAE_B65_2015 | 15-Mar | United Arab Emirates | Camelus dromedarius |
| 70 | MF598654 | camel/UAE_B64_2015 | 15-Mar | United Arab Emirates | Camelus dromedarius |
| 71 | MF598653 | camel/UAE_B63_2015 | 15-Mar | United Arab Emirates | Camelus dromedarius |
| 72 | MF598652 | camel/UAE_B62_2015 | 15-Mar | United Arab Emirates | Camelus dromedarius |

|    |          |                    |        |                      |                     |
|----|----------|--------------------|--------|----------------------|---------------------|
| 73 | MF598651 | camel/UAE_B61_2015 | 15-Mar | United Arab Emirates | Camelus dromedarius |
| 74 | MF598650 | camel/UAE_B60_2015 | 15-Mar | United Arab Emirates | Camelus dromedarius |
| 75 | MF598649 | camel/UAE_B59_2015 | 15-Mar | United Arab Emirates | Camelus dromedarius |
| 76 | MF598648 | camel/UAE_B58_2015 | 15-Mar | United Arab Emirates | Camelus dromedarius |
| 77 | MF598647 | camel/UAE_B56_2015 | 15-Mar | United Arab Emirates | Camelus dromedarius |
| 78 | MF598646 | camel/UAE_B55_2015 | 15-Mar | United Arab Emirates | Camelus dromedarius |
| 79 | MF598645 | camel/UAE_B54_2015 | 15-Mar | United Arab Emirates | Camelus dromedarius |
| 80 | MF598644 | camel/UAE_B53_2015 | 15-Mar | United Arab Emirates | Camelus dromedarius |
| 81 | MF598643 | camel/UAE_B52_2015 | 15-Mar | United Arab Emirates | Camelus dromedarius |
| 82 | MF598641 | camel/UAE_B50_2015 | 15-Mar | United Arab Emirates | Camelus dromedarius |
| 83 | MF598640 | camel/UAE_B49_2015 | 15-Mar | United Arab Emirates | Camelus dromedarius |
| 84 | MF598639 | camel/UAE_B48_2015 | 15-Mar | United Arab Emirates | Camelus dromedarius |
| 85 | MF598638 | camel/UAE_B47_2015 | 15-Mar | United Arab Emirates | Camelus dromedarius |
| 86 | MF598637 | camel/UAE_B46_2015 | 15-Mar | United Arab Emirates | Camelus dromedarius |
| 87 | MF598636 | camel/UAE_B45_2015 | 15-Mar | United Arab Emirates | Camelus dromedarius |
| 88 | MF598635 | camel/UAE_B44_2015 | 15-Mar | United Arab Emirates | Camelus dromedarius |
| 89 | MF598634 | camel/UAE_B42_2015 | 15-Mar | United Arab Emirates | Camelus dromedarius |
| 90 | MF598633 | camel/UAE_B41_2015 | 15-Mar | United Arab Emirates | Camelus dromedarius |
| 91 | MF598632 | camel/UAE_B40_2015 | 15-Mar | United Arab Emirates | Camelus dromedarius |
| 92 | MF598631 | camel/UAE_B39_2015 | 15-Mar | United Arab Emirates | Camelus dromedarius |
| 93 | MF598630 | camel/UAE_B38_2015 | 15-Mar | United Arab Emirates | Camelus dromedarius |
| 94 | MF598629 | camel/UAE_B37_2015 | 15-Mar | United Arab Emirates | Camelus dromedarius |
| 95 | MF598627 | camel/UAE_B35_2015 | 15-Mar | United Arab Emirates | Camelus dromedarius |
| 96 | MF598626 | camel/UAE_B34_2015 | 15-Mar | United Arab Emirates | Camelus dromedarius |
| 97 | MF598625 | camel/UAE_B33_2015 | 15-Mar | United Arab Emirates | Camelus dromedarius |

|     |          |                    |        |                      |                     |
|-----|----------|--------------------|--------|----------------------|---------------------|
| 98  | MF598624 | camel/UAE_B32_2015 | 15-Mar | United Arab Emirates | Camelus dromedarius |
| 99  | MF598623 | camel/UAE_B31_2015 | 15-Mar | United Arab Emirates | Camelus dromedarius |
| 100 | MF598622 | camel/UAE_B30_2015 | 15-Mar | United Arab Emirates | Camelus dromedarius |
| 101 | MF598621 | camel/UAE_B29_2015 | 15-Mar | United Arab Emirates | Camelus dromedarius |
| 102 | MF598620 | camel/UAE_B28_2015 | 15-Mar | United Arab Emirates | Camelus dromedarius |
| 103 | MF598619 | camel/UAE_B27_2015 | 15-Mar | United Arab Emirates | Camelus dromedarius |
| 104 | MF598618 | camel/UAE_B26_2015 | 15-Mar | United Arab Emirates | Camelus dromedarius |
| 105 | MF598617 | camel/UAE_B25_2015 | 15-Mar | United Arab Emirates | Camelus dromedarius |
| 106 | MF598616 | camel/UAE_B24_2015 | 15-Mar | United Arab Emirates | Camelus dromedarius |
| 107 | MF598615 | camel/UAE_B23_2015 | 15-Mar | United Arab Emirates | Camelus dromedarius |
| 108 | MF598614 | camel/UAE_B22_2015 | 15-Mar | United Arab Emirates | Camelus dromedarius |
| 109 | MF598613 | camel/UAE_B21_2015 | 15-Mar | United Arab Emirates | Camelus dromedarius |
| 110 | MF598612 | camel/UAE_B20_2015 | 15-Mar | United Arab Emirates | Camelus dromedarius |
| 111 | MF598611 | camel/UAE_B19_2015 | 15-Mar | United Arab Emirates | Camelus dromedarius |
| 112 | MF598610 | camel/UAE_B18_2015 | 15-Mar | United Arab Emirates | Camelus dromedarius |
| 113 | MF598609 | camel/UAE_B17_2015 | 15-Mar | United Arab Emirates | Camelus dromedarius |
| 114 | MF598608 | camel/UAE_B16_2015 | 15-Mar | United Arab Emirates | Camelus dromedarius |
| 115 | MF598607 | camel/UAE_B15_2015 | 15-Mar | United Arab Emirates | Camelus dromedarius |
| 116 | MF598606 | camel/UAE_B14_2015 | 15-Mar | United Arab Emirates | Camelus dromedarius |
| 117 | MF598605 | camel/UAE_B13_2015 | 15-Mar | United Arab Emirates | Camelus dromedarius |
| 118 | MF598604 | camel/UAE_B12_2015 | 15-Mar | United Arab Emirates | Camelus dromedarius |
| 119 | MF598603 | camel/UAE_B11_2015 | 15-Mar | United Arab Emirates | Camelus dromedarius |
| 120 | MF598602 | camel/UAE_B10_2015 | 15-Mar | United Arab Emirates | Camelus dromedarius |
| 121 | MF598601 | camel/UAE_B9_2015  | 15-Mar | United Arab Emirates | Camelus dromedarius |
| 122 | MF598600 | camel/UAE_B8_2015  | 15-Mar | United Arab Emirates | Camelus dromedarius |

|     |          |                               |           |                         |                     |
|-----|----------|-------------------------------|-----------|-------------------------|---------------------|
| 123 | MF598599 | camel/UAE_B7_2015             | 15-Mar    | United Arab Emirates    | Camelus dromedarius |
| 124 | MF598598 | camel/UAE_B6_2015             | 15-Mar    | United Arab Emirates    | Camelus dromedarius |
| 125 | MF598597 | camel/UAE_B5_2015             | 15-Mar    | United Arab Emirates    | Camelus dromedarius |
| 126 | MF598596 | camel/UAE_B4_2015             | 15-Mar    | United Arab Emirates    | Camelus dromedarius |
| 127 | MF598595 | camel/UAE_B2_2015             | 15-Mar    | United Arab Emirates    | Camelus dromedarius |
| 128 | MF598594 | camel/UAE_B1_2015             | 15-Mar    | United Arab Emirates    | Camelus dromedarius |
| 129 | KX034100 | MERS-CoV/KOR/Seoul/177-3-2015 | 3-Jul-15  | South Korea             | Homo sapiens        |
| 130 | KX034099 | MERS-CoV/KOR/Seoul/169-2015   | 26-Jun-15 | South Korea             | Homo sapiens        |
| 131 | KX034098 | MERS-CoV/KOR/Seoul/162-1-2015 | 22-Jun-15 | South Korea             | Homo sapiens        |
| 132 | KX034097 | MERS-CoV/KOR/Seoul/080-3-2015 | 17-Jun-15 | South Korea             | Homo sapiens        |
| 133 | KX034096 | MERS-CoV/KOR/Seoul/077-2-2015 | 17-Jun-15 | South Korea             | Homo sapiens        |
| 134 | KX034095 | MERS-CoV/KOR/Seoul/066-2015   | 4-Jun-15  | South Korea             | Homo sapiens        |
| 135 | KX034094 | MERS-CoV/KOR/Seoul/050-1-2015 | 11-Jun-15 | South Korea             | Homo sapiens        |
| 136 | KJ614529 | MG167/Jordan-N3/2012          |           |                         |                     |
| 137 | KJ713299 | KSA-CAMEL-376                 | 13-Nov    | Saudi Arabia            | Camelus dromedarius |
| 138 | KJ713298 | KSA-CAMEL-363                 | 13-Nov    | Saudi Arabia            | Camelus dromedarius |
| 139 | KJ713297 | KSA-CAMEL-503                 | 13-Nov    | Saudi Arabia            | Camelus dromedarius |
| 140 | KJ713296 | KSA-CAMEL-378                 | 13-Nov    | Saudi Arabia            | Camelus dromedarius |
| 141 | KJ713295 | KSA-CAMEL-505                 | 13-Nov    | Saudi Arabia            | Camelus dromedarius |
| 142 | KC667074 | England/Qatar/2012            | 19-Sep-12 | United Kingdom: England | Homo sapiens        |
| 143 | MH310912 | Hu/Riyadh-KSA-7344/2017       | 15-May-17 | Saudi Arabia            | Homo sapiens        |
| 144 | MH310911 | Hu/Riyadh-KSA-10717/2017      | 6-Jun-17  | Saudi Arabia            | Homo sapiens        |
| 145 | MH310910 | Hu/Riyadh-KSA-7696/2017       | 3-Jun-17  | Saudi Arabia            | Homo sapiens        |
| 146 | MH310909 | Hu/Riyadh-KSA-5767/2017       | 5-May-17  | Saudi Arabia            | Homo sapiens        |
| 147 | MG912608 | Hu/Riyadh-KSA-9730/2017       | 14-Jun-17 | Saudi Arabia            | Homo sapiens        |

|     |           |                                    |           |                |                     |
|-----|-----------|------------------------------------|-----------|----------------|---------------------|
| 148 | MG912607  | Hu/Riyadh-KSA-9522/2017            | 11-Jun-17 | Saudi Arabia   | Homo sapiens        |
| 149 | MG912606  | Hu/Riyadh-KSA-9852/2017            | 14-Jun-17 | Saudi Arabia   | Homo sapiens        |
| 150 | MG912605  | Hu/Riyadh-KSA-9835/2017            | 17-Jun-17 | Saudi Arabia   | Homo sapiens        |
| 151 | MG912604  | Hu/Riyadh-KSA-9689/2017            | 15-Jun-17 | Saudi Arabia   | Homo sapiens        |
| 152 | MG912603  | Hu/Riyadh-KSA-9693/2017            | 12-Jun-17 | Saudi Arabia   | Homo sapiens        |
| 153 | MG912602  | Hu/Riyadh-KSA-9614/2017            | 12-Jun-17 | Saudi Arabia   | Homo sapiens        |
| 154 | MG912601  | Hu/Riyadh-KSA-10308/2017           | 10-Jun-17 | Saudi Arabia   | Homo sapiens        |
| 155 | MG912600  | Hu/Riyadh-KSA-8882/2017            | 8-Jun-17  | Saudi Arabia   | Homo sapiens        |
| 156 | MG912599  | Hu/Riyadh-KSA-8667/2017            | 7-Jun-17  | Saudi Arabia   | Homo sapiens        |
| 157 | MG912598  | Hu/Riyadh-KSA-7680/2017            | 3-Jun-17  | Saudi Arabia   | Homo sapiens        |
| 158 | MG912597  | Hu/Riyadh-KSA-7423/2017            | 2-Jun-17  | Saudi Arabia   | Homo sapiens        |
| 159 | MG912596  | Hu/Riyadh-KSA-7373/2017            | 2-Jun-17  | Saudi Arabia   | Homo sapiens        |
| 160 | MG912595  | Hu/Riyadh-KSA-7178/2017            | 31-May-17 | Saudi Arabia   | Homo sapiens        |
| 161 | NC_038294 | England 1                          | 11-Sep-12 | United Kingdom | Homo sapiens        |
| 162 | MG366483  | Hu/Riyadh-KSA-7413/2017            | 2-Jun-17  | Saudi Arabia   | Homo sapiens        |
| 163 | NC_019843 | HCoV-EMC                           | 13-Jun-12 |                | Homo sapiens        |
| 164 | MH432120  | 2366                               | 28-Feb-17 | Saudi Arabia   | Homo sapiens        |
| 165 | MH371127  | 2362                               | 25-Nov-16 | Saudi Arabia   |                     |
| 166 | MG923481  | MERS-CoV camel/Nigeria/NV2020/2016 | 16-Feb-16 | Nigeria        | Camelus dromedarius |
| 167 | MG923480  | MERS-CoV camel/Nigeria/NV1787/2016 | 7-Feb-16  | Nigeria        | Camelus dromedarius |
| 168 | MG923479  | MERS-CoV camel/Nigeria/NV1712/2016 | 5-Feb-16  | Nigeria        | Camelus dromedarius |
| 169 | MG923478  | MERS-CoV camel/Nigeria/NV1673/2016 | 3-Feb-16  | Nigeria        | Camelus dromedarius |
| 170 | MG923477  | MERS-CoV camel/Nigeria/NV2040/2016 | 17-Feb-16 | Nigeria        | Camelus dromedarius |
| 171 | MG923476  | MERS-CoV camel/Nigeria/NV1989/2016 | 15-Feb-16 | Nigeria        | Camelus dromedarius |
| 172 | MG923475  | MERS-CoV camel/Nigeria/NV1657/2016 | 3-Feb-16  | Nigeria        | Camelus dromedarius |

|     |          |                                               |           |                      |                     |
|-----|----------|-----------------------------------------------|-----------|----------------------|---------------------|
| 173 | MG923474 | MERS-CoV camel/Nigeria/NV1405/2016            | 24-Jan-16 | Nigeria              | Camelus dromedarius |
| 174 | MG923473 | MERS-CoV camel/Burkina Faso/CIRAD-HKU697/2015 | 16-Mar-15 | Burkina Faso         | Camelus dromedarius |
| 175 | MG923472 | MERS-CoV camel/Nigeria/NS004/2015             | 13-Jan-15 | Nigeria              | Camelus dromedarius |
| 176 | MG923471 | MERS-CoV camel/Burkina Faso/CIRAD-HKU785/2015 | 18-Mar-15 | Burkina Faso         | Camelus dromedarius |
| 177 | MG923470 | MERS-CoV camel/Burkina Faso/CIRAD-HKU434/2015 | 23-Feb-15 | Burkina Faso         | Camelus dromedarius |
| 178 | MG923469 | MERS-CoV camel/Morocco/CIRAD-HKU213/2015      | 3-Mar-15  | Morocco              | Camelus dromedarius |
| 179 | MG923468 | MERS-CoV camel/Ethiopia/AAU-EPHI-HKU4458/2017 | 15-Mar-17 | Ethiopia             | Camelus dromedarius |
| 180 | MG923467 | MERS-CoV camel/Ethiopia/AAU-EPHI-HKU4448/2017 | 15-Mar-17 | Ethiopia             | Camelus dromedarius |
| 181 | MG923466 | MERS-CoV camel/Ethiopia/AAU-EPHI-HKU4412/2017 | 15-Mar-17 | Ethiopia             | Camelus dromedarius |
| 182 | KY688124 | Hu/Hufuf-KSA-11401/2015                       | 20-May-15 | Saudi Arabia         | Homo sapiens        |
| 183 | KY688123 | Hu/Hufuf-KSA-11150/2015                       | 13-May-15 | Saudi Arabia         | Homo sapiens        |
| 184 | KY688122 | Hu/Hufuf-KSA-11767/2015                       | 27-May-15 | Saudi Arabia         | Homo sapiens        |
| 185 | KY688121 | Hu/Hufuf-KSA-11442/2015                       | 22-May-15 | Saudi Arabia         | Homo sapiens        |
| 186 | KY688120 | Hu/Hufuf-KSA-11002/2015                       | 10-May-15 | Saudi Arabia         | Homo sapiens        |
| 187 | KY688119 | Hu/Aseer-KSA-Rs924/2015                       | 1-May-15  | Saudi Arabia         | Homo sapiens        |
| 188 | KY688118 | Hu/Khobar-KSA-6736/2015                       | 7-Feb-15  | Saudi Arabia         | Homo sapiens        |
| 189 | KY673149 | Camel/Oman_1_2015                             | 15-Jan    | Oman                 | Camel               |
| 190 | KY673148 | Hu/Oman_50_2015                               | 6-Jan-15  | Oman                 | Homo sapiens        |
| 191 | KY581700 | Camel/UAE_3B-C_2014                           | 18-Feb-14 | United Arab Emirates | camel               |
| 192 | KY581699 | Camel/UAE_2B-E_2014                           | 1-Jun-14  | United Arab Emirates | camel               |
| 193 | KY581698 | Camel/UAE_1H-F_2014                           | 1-Jun-14  | United Arab Emirates | camel               |
| 194 | KY581697 | Camel/UAE_1H-D_2014                           | 18-Feb-14 | United Arab Emirates | camel               |
| 195 | KY581696 | Camel/UAE_1H-B_2014                           | 12-Mar-14 | United Arab Emirates | camel               |
| 196 | KY581695 | Camel/UAE_1B-A_2014                           | 1-Jun-14  | United Arab Emirates | camel               |
| 197 | KY581694 | Hu/UAE_X_2014                                 | 2014      | United Arab Emirates | Homo sapiens        |



|     |          |                              |           |                      |              |
|-----|----------|------------------------------|-----------|----------------------|--------------|
| 198 | KY581693 | Hu/UAE_032_2014              | 20-Apr-14 | United Arab Emirates | Homo sapiens |
| 199 | KY581692 | Hu/UAE_025_2014              | 15-Apr-14 | United Arab Emirates | Homo sapiens |
| 200 | KY581691 | Hu/UAE_023_2014              | 14-Apr-14 | United Arab Emirates | Homo sapiens |
| 201 | KY581690 | Hu/UAE_017_2014              | 12-Apr-14 | United Arab Emirates | Homo sapiens |
| 202 | KY581689 | Hu/UAE_015_2014              | 10-Apr-14 | United Arab Emirates | Homo sapiens |
| 203 | KY581688 | Hu/UAE_011_2014              | 10-Apr-14 | United Arab Emirates | Homo sapiens |
| 204 | KY581687 | Hu/UAE_011_2013              | 23-Dec-13 | United Arab Emirates | Homo sapiens |
| 205 | KY581686 | Hu/UAE_009_2014              | 10-Apr-14 | United Arab Emirates | Homo sapiens |
| 206 | KY581685 | Hu/UAE_004_2013              | 12-Jul-13 | United Arab Emirates | Homo sapiens |
| 207 | KY581684 | Hu/UAE_002_2013              | 10-Jul-13 | United Arab Emirates | Homo sapiens |
| 208 | MG366883 | Hu/Riyadh-KSA-10024/2017     | 15-Jun-15 | Saudi Arabia         | Homo sapiens |
| 209 | MG366882 | Hu/Riyadh-KSA-8683/2017      | 7-Jun-15  | Saudi Arabia         | Homo sapiens |
| 210 | MG366881 | Hu/Riyadh-KSA-8677/2017      | 7-Jun-15  | Saudi Arabia         | Homo sapiens |
| 211 | MG366880 | Hu/Riyadh-KSA-7436/2017      | 2-Jun-15  | Saudi Arabia         | Homo sapiens |
| 212 | MG011359 | Hu/Riyadh-KSA-16559/2016     | 29-Mar-16 | Saudi Arabia         | Homo sapiens |
| 213 | MG011358 | Hu/Riyadh-KSA-24241/2016     | 21-Sep-16 | Saudi Arabia         | Homo sapiens |
| 214 | MG011357 | Hu/Riyadh-KSA-24244/2016     | 21-Sep-16 | Saudi Arabia         | Homo sapiens |
| 215 | MG011355 | Hu/Riyadh-KSA-21155/2016     | 1-Jul-16  | Saudi Arabia         | Homo sapiens |
| 216 | MG011354 | Hu/Riyadh-KSA-20570/2016     | 16-Jun-16 | Saudi Arabia         | Homo sapiens |
| 217 | MG011353 | Hu/Riyadh-KSA-19949/2016     | 1-Jun-16  | Saudi Arabia         | Homo sapiens |
| 218 | MG011352 | Hu/Qasim-KSA-893/2016        | 20-Jul-16 | Saudi Arabia         | Homo sapiens |
| 219 | MG011351 | Hu/Madinah-KSA-390/2016      | 10-Apr-16 | Saudi Arabia         | Homo sapiens |
| 220 | MG011345 | Hu/Riyadh-KSA-15385/2016     | 18-Mar-16 | Saudi Arabia         | Homo sapiens |
| 221 | MG011342 | Hu/Riyadh-KSA-13984/2016     | 7-Mar-16  | Saudi Arabia         | Homo sapiens |
| 222 | MG011362 | Hu/Riyadh-KSA-K37029157/2016 | 25-Dec-16 | Saudi Arabia         | Homo sapiens |

|     |          |                               |           |              |              |
|-----|----------|-------------------------------|-----------|--------------|--------------|
| 223 | MG011361 | Hu/Riyadh-KSA-K17000405/2017  | 10-Jan-17 | Saudi Arabia | Homo sapiens |
| 224 | MG011360 | Hu/Riyadh-KSA-K17000887/2017  | 23-Jan-17 | Saudi Arabia | Homo sapiens |
| 225 | MG011356 | Hu/Riyadh-KSA-21891/2016      | 12-Jul-16 | Saudi Arabia | Homo sapiens |
| 226 | MG011350 | Hu/Riyadh-KSA-16849/2016      | 4-Apr-16  | Saudi Arabia | Homo sapiens |
| 227 | MG011349 | Hu/Riyadh-KSA-17382/2016      | 13-Apr-16 | Saudi Arabia | Homo sapiens |
| 228 | MG011348 | Hu/Riyadh-KSA-17756/2016      | 18-Apr-16 | Saudi Arabia | Homo sapiens |
| 229 | MG011347 | Hu/Riyadh-KSA-14670/2016      | 13-Mar-16 | Saudi Arabia | Homo sapiens |
| 230 | MG011346 | Hu/Riyadh-KSA-14949/2016      | 14-Mar-16 | Saudi Arabia | Homo sapiens |
| 231 | MG011344 | Hu/Riyadh-KSA-14675/2016      | 13-Mar-16 | Saudi Arabia | Homo sapiens |
| 232 | MG011343 | Hu/Riyadh-KSA-14607/2016      | 12-Mar-16 | Saudi Arabia | Homo sapiens |
| 233 | MG011341 | Hu/Qasim-KSA-13922/2016       | 6-Mar-16  | Saudi Arabia | Homo sapiens |
| 234 | MG011340 | Hu/Riyadh-KSA-13798/2016      | 5-Mar-16  | Saudi Arabia | Homo sapiens |
| 235 | KT225476 | MERS-CoV/THA/CU/17_06_2015    | 17-Jun-15 | Thailand     | Homo sapiens |
| 236 | KT326819 | MERS-CoV/KOR/KNIH/001_05_2015 | 22-May-15 | South Korea  | Homo sapiens |
| 237 | KX154694 | Hu/Artawiyah-KSA-13328/2016   | 29-Feb-16 | Saudi Arabia | Homo sapiens |
| 238 | KX154693 | Hu/Riyadh-KSA-13127/2016      | 29-Feb-16 | Saudi Arabia | Homo sapiens |
| 239 | KX154692 | Hu/Riyadh-KSA-12969/2016      | 27-Feb-16 | Saudi Arabia | Homo sapiens |
| 240 | KX154691 | Hu/Riyadh-KSA-12832/2016      | 25-Feb-16 | Saudi Arabia | Homo sapiens |
| 241 | KX154690 | Hu/Jeddah-KSA-161RS1146/2016  | 16-Jan    | Saudi Arabia | Homo sapiens |
| 242 | KX154689 | Hu/Riyadh-KSA-10208/2016      | 16-Jan    | Saudi Arabia | Homo sapiens |
| 243 | KX154688 | Hu/Riyadh-KSA-12160/2016      | 16-Feb    | Saudi Arabia | Homo sapiens |
| 244 | KX154687 | Hu/Riyadh-KSA-11958/2016      | 16-Feb    | Saudi Arabia | Homo sapiens |
| 245 | KX154686 | Hu/Riyadh-KSA-11898/2016      | 16-Feb    | Saudi Arabia | Homo sapiens |
| 246 | KX154685 | Hu/Riyadh-KSA-11740/2016      | 16-Feb    | Saudi Arabia | Homo sapiens |
| 247 | KX154684 | Hu/Riyadh-KSA-11739/2016      | 16-Feb    | Saudi Arabia | Homo sapiens |

|     |          |                               |           |                      |                     |
|-----|----------|-------------------------------|-----------|----------------------|---------------------|
| 248 | KX108946 | D1189.1/15                    | 18-May-15 | United Arab Emirates | Camelus dromedarius |
| 249 | KX108945 | D1271/15                      | 29-May-15 | United Arab Emirates | Camelus dromedarius |
| 250 | KX108944 | D1157/15                      | 12-May-15 | United Arab Emirates | Camelus dromedarius |
| 251 | KX108943 | D998/15                       | 23-Apr-15 | United Arab Emirates | Camelus dromedarius |
| 252 | KX108942 | D389/15                       | 15-Feb-15 | United Arab Emirates | Camelus dromedarius |
| 253 | KX108941 | D383/15                       | 14-Feb-15 | United Arab Emirates | Camelus dromedarius |
| 254 | KX108940 | D374/15                       | 12-Feb-15 | United Arab Emirates | Camelus dromedarius |
| 255 | KX108939 | D252/15                       | 30-Jan-15 | United Arab Emirates | Camelus dromedarius |
| 256 | KX108938 | D2597.2/14                    | 13-Dec-14 | United Arab Emirates | Camelus dromedarius |
| 257 | KX108937 | D1164.1/14                    | 2-Jun-14  | United Arab Emirates | Camelus dromedarius |
| 258 | KT861628 | Hu/Jordan-201440011123/2014   | 21-Apr-14 | Jordan               | Homo sapiens        |
| 259 | KT861627 | Hu/Jordan-20140010168/2014    | 22-Jan-14 | Jordan               | Homo sapiens        |
| 260 | KT877351 | KSA_1724                      | 14-Sep    | Saudi Arabia         | Camelus dromedarius |
| 261 | KT877350 | KSA_1725                      | 14-Sep    | Saudi Arabia         | Camelus dromedarius |
| 262 | KT368860 | camel/Jeddah/Jd6(b)/2015      | 15-Jan    | Saudi Arabia         | camel               |
| 263 | KU710265 | Hu/Taif/KSA-7032/2014/S530del | 4-Nov-14  | Saudi Arabia         | Homo sapiens        |
| 264 | KU710264 | Hu/Taif/KSA-7032/2014         | 4-Nov-14  | Saudi Arabia         | Homo sapiens        |
| 265 | KU851864 | Hu/Riyadh-KSA-16098/2015      | 24-Aug-15 | Saudi Arabia         | Homo sapiens        |
| 266 | KU851863 | Hu/Riyadh-KSA-16077/2015      | 27-Aug-15 | Saudi Arabia         | Homo sapiens        |
| 267 | KU851862 | Hu/Riyadh-KSA-16117/2015      | 24-Aug-15 | Saudi Arabia         | Homo sapiens        |
| 268 | KU851861 | Hu/Riyadh-KSA-16120/2015      | 24-Aug-15 | Saudi Arabia         | Homo sapiens        |
| 269 | KU851860 | Hu/Riyadh-KSA-16121/2015      | 24-Aug-15 | Saudi Arabia         | Homo sapiens        |
| 270 | KU851859 | Hu/Jeddah-KSA-3RS2702/2015    | 12-Jul-15 | Saudi Arabia         | Homo sapiens        |
| 271 | KP209313 | Abu Dhabi_UAE_26_2014         | 13-Apr-14 | United Arab Emirates | Homo sapiens        |
| 272 | KP209312 | Abu Dhabi_UAE_9_2013          | 15-Nov-13 | United Arab Emirates | Homo sapiens        |

|     |          |                              |           |                      |              |
|-----|----------|------------------------------|-----------|----------------------|--------------|
| 273 | KP209311 | Abu Dhabi_UAE_33_2014        | 17-Apr-14 | United Arab Emirates | Homo sapiens |
| 274 | KP209310 | Abu Dhabi/Gayathi_UAE_2_2014 | 7-Mar-14  | United Arab Emirates | Homo sapiens |
| 275 | KP209309 | Abu Dhabi_UAE_30_2014        | 19-Apr-14 | United Arab Emirates | Homo sapiens |
| 276 | KP209308 | Abu Dhabi_UAE_16_2014        | 10-Apr-14 | United Arab Emirates | Homo sapiens |
| 277 | KP209307 | Abu Dhabi_UAE_18_2014        | 10-Apr-14 | United Arab Emirates | Homo sapiens |
| 278 | KP209306 | Abu Dhabi_UAE_8_2014         | 7-Apr-14  | United Arab Emirates | Homo sapiens |
| 279 | KU308549 | Korea/Seoul/SNU1-035/2015    | 8-Jun-15  | South Korea          | Homo sapiens |
| 280 | KT026456 | Hu/Riyadh_KSA_4050_2015      | 1-Mar-15  | Saudi Arabia         | Homo sapiens |
| 281 | KT026455 | Hu/Riyadh_KSA_2959_2015      | 10-Feb-15 | Saudi Arabia         | Homo sapiens |
| 282 | KT026454 | Hu/Riyadh_KSA_4050_2015      | 1-Mar-15  | Saudi Arabia         | Homo sapiens |
| 283 | KT026453 | Hu/Riyadh_KSA_2959_2015      | 10-Feb-15 | Saudi Arabia         | Homo sapiens |
| 284 | KT374057 | KOREA/Seoul/168-2-2015       | 24-Jun-15 | South Korea          | Homo sapiens |
| 285 | KT374056 | KOREA/Seoul/168-1-2015       | 21-Jun-15 | South Korea          | Homo sapiens |
| 286 | KT374055 | KOREA/Seoul/035-2-2015       | 18-Jun-15 | South Korea          | Homo sapiens |
| 287 | KT374054 | KOREA/Seoul/035-1-2015       | 3-Jun-15  | South Korea          | Homo sapiens |
| 288 | KT374053 | KOREA/Seoul/014-2-2015       | 13-Jun-15 | South Korea          | Homo sapiens |
| 289 | KT374052 | KOREA/Seoul/014-1-2015       | 31-May-15 | South Korea          | Homo sapiens |
| 290 | KT374051 | KOREA/Seoul/163-1-2015       | 19-Jun-15 | South Korea          | Homo sapiens |
| 291 | KT374050 | KOREA/Seoul/163-2-2015       | 29-Jun-15 | South Korea          | Homo sapiens |
| 292 | KT806055 | Hu/Jeddah-KSA-C20860/2015    | 10-Feb-15 | Saudi Arabia         | Homo sapiens |
| 293 | KT806054 | Hu/Najran-KSA-C20915/2015    | 13-Feb-15 | Saudi Arabia         | Homo sapiens |
| 294 | KT806053 | Hu/Kharj-KSA-2598/2015       | 2-Feb-15  | Saudi Arabia         | Homo sapiens |
| 295 | KT806052 | Hu/Kharj-KSA-2599/2015       | 2-Feb-15  | Saudi Arabia         | Homo sapiens |
| 296 | KT806051 | Hu/Riyadh-KSA-2716/2015      | 5-Feb-15  | Saudi Arabia         | Homo sapiens |
| 297 | KT806049 | Hu/Riyadh-KSA-3181/2015      | 15-Feb-15 | Saudi Arabia         | Homo sapiens |

|     |          |                           |           |                      |                     |
|-----|----------|---------------------------|-----------|----------------------|---------------------|
| 298 | KT806048 | Hu/Khobar-KSA-6736/2015   | 7-Feb-15  | Saudi Arabia         | Homo sapiens        |
| 299 | KT806047 | Hu/Hufuf-KSA-9158/2015    | 27-Mar-15 | Saudi Arabia         | Homo sapiens        |
| 300 | KT806046 | Hu/Hufuf-KSA-11002/2015   | 10-May-15 | Saudi Arabia         | Homo sapiens        |
| 301 | KT806045 | Hu/Jeddah-KSA-C21271/2015 | 22-Feb-15 | Saudi Arabia         | Homo sapiens        |
| 302 | KT806044 | Hu/Jeddah-KSA-C20843/2015 | 9-Feb-15  | Saudi Arabia         | Homo sapiens        |
| 303 | KU242424 | Camel/UAE/D469-14         | 4-Mar-14  | United Arab Emirates | Camelus dromedarius |
| 304 | KU242423 | Camel/UAE/D511-14         | 12-Mar-14 | United Arab Emirates | Camelus dromedarius |
| 305 | KT368890 | camel/Taif/T157(b)/2015   | 15-Mar    | Saudi Arabia         | camel               |
| 306 | KT368889 | camel/Taif/T150/2015      | 15-Mar    | Saudi Arabia         | camel               |
| 307 | KT368888 | camel/Taif/T98/2015       | 15-Apr    | Saudi Arabia         | camel               |
| 308 | KT368887 | camel/Taif/T92/2015       | 15-Apr    | Saudi Arabia         | camel               |
| 309 | KT368886 | camel/Taif/T91(b)/2015    | 15-Apr    | Saudi Arabia         | camel               |
| 310 | KT368885 | camel/Taif/T89/2015       | 15-Apr    | Saudi Arabia         | camel               |
| 311 | KT368884 | camel/Taif/T68/2015       | 15-Apr    | Saudi Arabia         | camel               |
| 312 | KT368883 | camel/Taif/T22/2015       | 15-Apr    | Saudi Arabia         | camel               |
| 313 | KT368882 | camel/Taif/T16/2015       | 15-Apr    | Saudi Arabia         | camel               |
| 314 | KT368881 | camel/Taif/T7/2015        | 15-Apr    | Saudi Arabia         | camel               |
| 315 | KT368880 | camel/Taif/T3/2015        | 15-Apr    | Saudi Arabia         | camel               |
| 316 | KT368879 | camel/Riyadh/Ry86/2015    | 15-Mar    | Saudi Arabia         | camel               |
| 317 | KT368878 | camel/Riyadh/Ry79/2015    | 15-Mar    | Saudi Arabia         | camel               |
| 318 | KT368877 | camel/Riyadh/Ry64/2015    | 15-Mar    | Saudi Arabia         | camel               |
| 319 | KT368876 | camel/Riyadh/Ry63/2015    | 15-Mar    | Saudi Arabia         | camel               |
| 320 | KT368875 | camel/Riyadh/Ry179/2015   | 15-Mar    | Saudi Arabia         | camel               |
| 321 | KT368874 | camel/Riyadh/Ry178/2015   | 15-Mar    | Saudi Arabia         | camel               |
| 322 | KT368873 | camel/Riyadh/Ry177/2015   | 15-Mar    | Saudi Arabia         | camel               |

|     |          |                            |        |              |       |
|-----|----------|----------------------------|--------|--------------|-------|
| 323 | KT368872 | camel/Riyadh/Ry173/2015    | 15-Mar | Saudi Arabia | camel |
| 324 | KT368871 | camel/Riyadh/Ry162/2015    | 15-Mar | Saudi Arabia | camel |
| 325 | KT368870 | camel/Riyadh/Ry159(b)/2015 | 15-Mar | Saudi Arabia | camel |
| 326 | KT368869 | camel/Riyadh/Ry137/2015    | 15-Mar | Saudi Arabia | camel |
| 327 | KT368868 | camel/Riyadh/Ry136/2015    | 15-Mar | Saudi Arabia | camel |
| 328 | KT368867 | camel/Jeddah/Jd199/2015    | 15-Feb | Saudi Arabia | camel |
| 329 | KT368866 | camel/Jeddah/Jd175/2015    | 15-Feb | Saudi Arabia | camel |
| 330 | KT368865 | camel/Jeddah/Jd90/2015     | 15-Jan | Saudi Arabia | camel |
| 331 | KT368864 | camel/Jeddah/Jd87/2015     | 15-Jan | Saudi Arabia | camel |
| 332 | KT368863 | camel/Jeddah/Jd86/2015     | 15-Jan | Saudi Arabia | camel |
| 333 | KT368862 | camel/Jeddah/Jd85/2015     | 15-Jan | Saudi Arabia | camel |
| 334 | KT368861 | camel/Jeddah/Jd7/2015      | 15-Jan | Saudi Arabia | camel |
| 335 | KT368859 | camel/Jeddah/Jd4/2015      | 15-Jan | Saudi Arabia | camel |
| 336 | KT368858 | camel/Jeddah/Jd1(b)/2015   | 15-Jan | Saudi Arabia | camel |
| 337 | KT368857 | camel/Jeddah/S99/2014      | 14-Sep | Saudi Arabia | camel |
| 338 | KT368856 | camel/Jeddah/S94/2014      | 14-Sep | Saudi Arabia | camel |
| 339 | KT368855 | camel/Jeddah/S93/2014      | 14-Sep | Saudi Arabia | camel |
| 340 | KT368854 | camel/Jeddah/S73/2014      | 14-Sep | Saudi Arabia | camel |
| 341 | KT368853 | camel/Jeddah/S100/2014     | 14-Sep | Saudi Arabia | camel |
| 342 | KT368852 | camel/Jeddah/O47(b)/2014   | 14-Oct | Saudi Arabia | camel |
| 343 | KT368851 | camel/Jeddah/O30/2014      | 14-Oct | Saudi Arabia | camel |
| 344 | KT368850 | camel/Jeddah/O24/2014      | 14-Oct | Saudi Arabia | camel |
| 345 | KT368849 | camel/Jeddah/O23(b)/2014   | 14-Oct | Saudi Arabia | camel |
| 346 | KT368848 | camel/Jeddah/N68(b)/2014   | 14-Nov | Saudi Arabia | camel |
| 347 | KT368847 | camel/Jeddah/N62(b)/2014   | 14-Nov | Saudi Arabia | camel |

|     |          |                          |          |                             |                 |
|-----|----------|--------------------------|----------|-----------------------------|-----------------|
| 348 | KT368846 | camel/Jeddah/N51/2014    | 14-Nov   | Saudi Arabia                | camel           |
| 349 | KT368845 | camel/Jeddah/D92/2014    | 14-Dec   | Saudi Arabia                | camel           |
| 350 | KT368844 | camel/Jeddah/D90/2014    | 14-Dec   | Saudi Arabia                | camel           |
| 351 | KT368843 | camel/Jeddah/D88/2014    | 14-Dec   | Saudi Arabia                | camel           |
| 352 | KT368842 | camel/Jeddah/D50(b)/2014 | 14-Dec   | Saudi Arabia                | camel           |
| 353 | KT368841 | camel/Jeddah/D49/2014    | 14-Dec   | Saudi Arabia                | camel           |
| 354 | KT368840 | camel/Jeddah/D48/2014    | 14-Dec   | Saudi Arabia                | camel           |
| 355 | KT368839 | camel/Jeddah/D47/2014    | 14-Dec   | Saudi Arabia                | camel           |
| 356 | KT368838 | camel/Jeddah/D46(b)/2014 | 14-Dec   | Saudi Arabia                | camel           |
| 357 | KT368837 | camel/Jeddah/D45/2014    | 14-Dec   | Saudi Arabia                | camel           |
| 358 | KT368836 | camel/Jeddah/D43(b)/2014 | 14-Dec   | Saudi Arabia                | camel           |
| 359 | KT368835 | camel/Jeddah/D42/2014    | 14-Dec   | Saudi Arabia                | camel           |
| 360 | KT368834 | camel/Jeddah/D40/2014    | 14-Dec   | Saudi Arabia                | camel           |
| 361 | KT368833 | camel/Jeddah/D38(b)/2014 | 14-Dec   | Saudi Arabia                | camel           |
| 362 | KT368832 | camel/Jeddah/D36/2014    | 14-Dec   | Saudi Arabia                | camel           |
| 363 | KT368831 | camel/Jeddah/D35/2014    | 14-Dec   | Saudi Arabia                | camel           |
| 364 | KT368830 | camel/Jeddah/D34/2014    | 14-Dec   | Saudi Arabia                | camel           |
| 365 | KT368829 | camel/Jeddah/D33(b)/2014 | 14-Dec   | Saudi Arabia                | camel           |
| 366 | KT368828 | camel/Jeddah/D100/2014   | 14-Dec   | Saudi Arabia                | camel           |
| 367 | KT368827 | camel/Jeddah/401/2014    | 14-Sep   | Saudi Arabia                | camel           |
| 368 | KT368826 | camel/Riyadh/Ry84N/2014  | 14-Jul   | Saudi Arabia                | camel           |
| 369 | KT368825 | camel/Riyadh/Ry23N/2014  | 14-Jul   | Saudi Arabia                | camel           |
| 370 | KT368824 | camel/Jeddah/F13A/2014   | 14-May   | Saudi Arabia                | camel           |
| 371 | KT751244 | D2731.3/14               |          | United Arab Emirates: Dubai | dromedary camel |
| 372 | KT121581 | KFMC-7                   | 3-May-14 | Saudi Arabia                | Homo sapiens    |

|     |          |                                             |           |              |              |
|-----|----------|---------------------------------------------|-----------|--------------|--------------|
| 373 | KT121580 | KFMC-1                                      | 28-Apr-14 | Saudi Arabia | Homo sapiens |
| 374 | KT121579 | KFMC-8                                      | 30-Apr-14 | Saudi Arabia | Homo sapiens |
| 375 | KT121578 | KFMC-10                                     | 1-May-14  | Saudi Arabia | Homo sapiens |
| 376 | KT121577 | KFMC-2                                      | 11-May-14 | Saudi Arabia | Homo sapiens |
| 377 | KT121576 | KFMC-6                                      | 18-May-14 | Saudi Arabia | Homo sapiens |
| 378 | KT121575 | KFMC-4                                      | 12-May-14 | Saudi Arabia | Homo sapiens |
| 379 | KT121574 | KFMC-9                                      | 7-May-14  | Saudi Arabia | Homo sapiens |
| 380 | KT121573 | KFMC-3                                      | 9-May-14  | Saudi Arabia | Homo sapiens |
| 381 | KT121572 | KFMC-5                                      | 12-May-14 | Saudi Arabia | Homo sapiens |
| 382 | KM027262 | Riyadh_2014KSA_683/KSA/2014                 | 22-Apr-14 | Saudi Arabia | Homo sapiens |
| 383 | KM027261 | Makkah_C9355/KSA/Makkah/2014-04-15          | 15-Apr-14 | Saudi Arabia | Homo sapiens |
| 384 | KM027260 | Jeddah_C10306/KSA/2014-04-20                | 21-Apr-14 | Saudi Arabia | Homo sapiens |
| 385 | KM027259 | Jeddah_C9055/KSA/2014-04-14                 | 14-Apr-14 | Saudi Arabia | Homo sapiens |
| 386 | KM027258 | Jeddah_C8826/KSA/2014-04-12                 | 12-Apr-14 | Saudi Arabia | Homo sapiens |
| 387 | KM027257 | Jeddah_C7770/KSA/2014-04-07                 | 7-Apr-14  | Saudi Arabia | Homo sapiens |
| 388 | KM027256 | Jeddah_C7569/KSA/2014-04-03                 | 2014      | Saudi Arabia | Homo sapiens |
| 389 | KM027255 | Jeddah_C7149/KSA/2014-04-05                 | 2014      | Saudi Arabia | Homo sapiens |
| 390 | KJ813439 | Indiana/USA-1_Saudi Arabia_2014             | 30-Apr-14 | USA          | Homo sapiens |
| 391 | KT156561 | Hu/Oman_2874_2013                           | 28-Dec-13 | Oman         | Homo sapiens |
| 392 | KT156560 | Hu/Oman_2285_2013                           | 28-Oct-13 | Oman         | Homo sapiens |
| 393 | KR011266 | Hu/Riyadh-KSA-2049/2015                     | 6-Jan-15  | Saudi Arabia | Homo sapiens |
| 394 | KR011265 | Hu/Riyadh-KSA-2466/2015                     | 26-Jan-15 | Saudi Arabia | Homo sapiens |
| 395 | KR011264 | Hu/Riyadh-KSA-2343/2015                     | 21-Jan-15 | Saudi Arabia | Homo sapiens |
| 396 | KR011263 | Hu/Riyadh-KSA-2345/2015                     | 21-Jan-15 | Saudi Arabia | Homo sapiens |
| 397 | KJ361503 | Hu-France - FRA2_130569-2013_Isolate_Sanger | 7-May-13  | France       | Homo sapiens |



|     |          |                                             |           |                      |                     |
|-----|----------|---------------------------------------------|-----------|----------------------|---------------------|
| 398 | KJ361502 | Hu-France - FRA2_130569-2013_InSpu_Sanger   | 7-May-13  | France               | Homo sapiens        |
| 399 | KJ361501 | Hu-France - FRA2_130569-2013_IS_HTS         | 7-May-13  | France               | Homo sapiens        |
| 400 | KJ361500 | Hu-France (UAE) - FRA1_1627-2013_BAL_Sanger | 26-Apr-13 | France               | Homo sapiens        |
| 401 | KP719933 | Camel/UAE/D1209/2014                        |           | United Arab Emirates | Camelus dromedarius |
| 402 | KP719932 | Camel/UAE/D1243.12/2014                     | 14-Jun    | United Arab Emirates | Camelus dromedarius |
| 403 | KP719931 | Camel/UAE/D1339.2/2014                      | 14-Jun    | United Arab Emirates | Camelus dromedarius |
| 404 | KP719930 | Camel/UAE/D1164.14/2014                     | 14-Jun    | United Arab Emirates | Camelus dromedarius |
| 405 | KP719929 | Camel/UAE/D1164.11/2014                     | 14-Jun    | United Arab Emirates | Camelus dromedarius |
| 406 | KP719928 | Camel/UAE/D1164.10/2014                     | 14-Jun    | United Arab Emirates | Camelus dromedarius |
| 407 | KP719927 | Camel/UAE/D1164.9/2014                      | 14-Jun    | United Arab Emirates | Camelus dromedarius |
| 408 | KM210278 | England/3/2013                              | 10-Feb-13 | United Kingdom       | Homo sapiens        |
| 409 | KM210277 | England/4/2013                              | 13-Feb-13 | United Kingdom       | Homo sapiens        |
| 410 | KP223131 | Florida/USA-2_Saudi Arabia_2014             | 14-Jun    | USA                  | Homo sapiens        |
| 411 | KJ650098 | Camel/Qatar_2_2014                          | 16-Feb-14 | Qatar                | Camelus dromedarius |
| 412 | KJ650297 | KFU-HKU 1                                   | 30-Nov-13 | Saudi Arabia         | dromedary           |
| 413 | KJ650296 | KFU-HKU 19Dam                               | 30-Dec-13 | Saudi Arabia         | dromedary           |
| 414 | KJ650295 | KFU-HKU 13                                  | 30-Dec-13 | Saudi Arabia         | dromedary           |
| 415 | KF600652 | Riyadh_2_2012                               | 30-Oct-12 | Saudi Arabia         | Homo sapiens        |
| 416 | KF600651 | Al-Hasa_18_2013                             | 23-May-13 | Saudi Arabia         | Homo sapiens        |
| 417 | KF600647 | Al-Hasa_17_2013                             | 15-May-13 | Saudi Arabia         | Homo sapiens        |
| 418 | KF600645 | Al-Hasa_15_2013                             | 11-May-13 | Saudi Arabia         | Homo sapiens        |
| 419 | KF600644 | Al-Hasa_16_2013                             | 12-May-13 | Saudi Arabia         | Homo sapiens        |
| 420 | KF600634 | Al-Hasa_21_2013                             | 30-May-13 | Saudi Arabia         | Homo sapiens        |
| 421 | KF600632 | Al-Hasa_19_2013                             | 23-May-13 | Saudi Arabia         | Homo sapiens        |
| 422 | KF600630 | Buraidah_1_2013                             | 13-May-13 | Saudi Arabia         | Homo sapiens        |

|     |          |                                 |           |                      |                     |
|-----|----------|---------------------------------|-----------|----------------------|---------------------|
| 423 | KF600628 | Hafr-Al-Batin_1_2013            | 4-Jun-13  | Saudi Arabia         | Homo sapiens        |
| 424 | KF600627 | Al-Hasa_12_2013                 | 7-May-13  | Saudi Arabia         | Homo sapiens        |
| 425 | KF600620 | Bisha_1_2012                    | 19-Jun-12 | Saudi Arabia         | Homo sapiens        |
| 426 | KF600613 | Riyadh_3_2013                   | 5-Feb-13  | Saudi Arabia         | Homo sapiens        |
| 427 | KF600612 | Riyadh_1_2012                   | 23-Oct-12 | Saudi Arabia         | Homo sapiens        |
| 428 | KF192507 | Munich                          | 2013      | United Arab Emirates | Homo sapiens        |
| 429 | KF186565 | Al-Hasa_3_2013                  | 22-Apr-13 | Saudi Arabia         | Homo sapiens        |
| 430 | KF186567 | Al-Hasa_1_2013                  | 9-May-13  | Saudi Arabia         | Homo sapiens        |
| 431 | KF186566 | Al-Hasa_2_2013                  | 21-Apr-13 | Saudi Arabia         | Homo sapiens        |
| 432 | KF186564 | Al-Hasa_4_2013                  | 1-May-13  | Saudi Arabia         | Homo sapiens        |
| 433 | KM015348 | England/2/2013                  | 10-Feb-13 | United Kingdom       | Homo sapiens        |
| 434 | KF958702 | MERS-CoV-Jeddah-human-1         | 5-Nov-13  | Saudi Arabia         | Homo sapiens        |
| 435 | KF917527 | MERS-CoV-Jeddah-Camel-1         | 8-Nov-13  | Saudi Arabia         | camel               |
| 436 | KJ556336 | Jeddah_1_2013                   | 6-Nov-13  | Saudi Arabia         | Homo sapiens        |
| 437 | KJ477102 | NRCE-HKU205                     | 2013      | Egypt                | camelus dromedarius |
| 438 | KJ829365 | Florida/USA-2_Saudi Arabia_2014 | 10-May-14 | USA                  | Homo sapiens        |
| 439 | KJ156952 | Riyadh_4_2013                   | 1-Mar-13  | Saudi Arabia         | Homo sapiens        |
| 440 | KJ156949 | Taif_1_2013                     | 12-Jun-13 | Saudi Arabia         | Homo sapiens        |
| 441 | KJ156944 | Riyadh_5_2013                   | 2-Jul-13  | Saudi Arabia         | Homo sapiens        |
| 442 | KJ156934 | Riyadh_14_2013                  | 15-Aug-13 | Saudi Arabia         | Homo sapiens        |
| 443 | KJ156910 | Hafr-Al-Batin_2_2013            | 5-Aug-13  | Saudi Arabia         | Homo sapiens        |
| 444 | KJ156881 | Wadi-Ad-Dawasir_1_2013          | 12-Jun-13 | Saudi Arabia         | Homo sapiens        |
| 445 | KJ156874 | Hafr-Al-Batin_6_2013            | 28-Aug-13 | Saudi Arabia         | Homo sapiens        |
| 446 | KJ156869 | Riyadh_9_2013                   | 17-Jul-13 | Saudi Arabia         | Homo sapiens        |
| 447 | KJ156866 | Al-Hasa_25_2013                 | 2-May-13  | Saudi Arabia         | Homo sapiens        |

|     |          |                                      |           |                      |                     |
|-----|----------|--------------------------------------|-----------|----------------------|---------------------|
| 448 | KF961222 | Qatar4                               | 17-Oct-13 | Qatar                | Homo sapiens        |
| 449 | KF961221 | Qatar3                               | 13-Oct-13 | Qatar                | Homo sapiens        |
| 450 | KF745068 | FRA/UAE                              | 7-May-13  | France               | Homo sapiens        |
| 451 | KC164505 | England 1                            | 11-Sep-12 | United Kingdom       | Homo sapiens        |
| 452 | KC776174 | Jordan-N3/2012                       | 12-Apr    | Jordan               | Homo sapiens        |
| 453 | JX869059 | HCoV-EMC                             | 13-Jun-12 |                      | Homo sapiens        |
| 454 | KU740200 | MERS CoV/camel/Egypt/NRCE-NC163/2014 | 17-Dec-14 | Egypt                | Camelus dromedarius |
| 455 | MF679174 | camel/UAE_414372_W4_2015             | 15-Apr    | United Arab Emirates | Camelus dromedarius |
| 456 | MF679173 | camel/UAE_416452_W3_2015             | 15-Apr    | United Arab Emirates | Camelus dromedarius |
| 457 | MF679172 | camel/UAE_B94_2015                   | 15-Mar    | United Arab Emirates | Camelus dromedarius |
| 458 | MF679171 | camel/UAE_B89_2015                   | 15-Mar    | United Arab Emirates | Camelus dromedarius |
